# Supplementary material for: Computational Screening of Newly Designed Compounds against Coxsackievirus A16 and Enterovirus A71
Source: MDPI journal article supplement (doi:10.3390/molecules27061908), 2022-03-15
Supplement: s1 [file s1]

## Supplementary Information

### Computational Screening of Newly Designed Compounds Against Coxsackievirus A16 and Enterovirus A71

**Amita Sripattaraphan<sup>1</sup>, Kamonpan Sanachai<sup>1</sup>, Warinthorn  
Chavasiri<sup>2</sup>, Siwaporn Boonyasuppayakorn<sup>3</sup> Phornphimon Maitarad<sup>4</sup>  
and Thanyada Rungrotmongkol<sup>1,5, \*</sup>**

*<sup>1</sup>Structural and Computational Biology Research Unit, Department of Biochemistry, Faculty of Science, Chulalongkorn University, Bangkok, Thailand*

*<sup>2</sup>Department of Chemistry, Faculty of Science, Chulalongkorn University, Bangkok 10330, Thailand*

*<sup>3</sup>Applied Medical Virology Research Unit, Department of Microbiology, Faculty of Medicine, Chulalongkorn University, Bangkok 10330, Thailand*

*<sup>4</sup>Research Center of Nano Science and Technology, Shanghai University, Shanghai 200444, PR China*

*<sup>5</sup>Ph.D. Program in Bioinformatics and Computational Biology, Faculty of Science, Chulalongkorn University, Bangkok 10330, Thailand*

\*Corresponding author: E-mail: [thanyada.r@chula.ac.th](mailto:thanyada.r@chula.ac.th), [t.rungrotmongkol@gmail.com](mailto:t.rungrotmongkol@gmail.com)

## Table of Content

|   |                                                                                                                           |     |
|---|---------------------------------------------------------------------------------------------------------------------------|-----|
| 1 | Table S1. Chemical structures of rupintrivir and its 50 analogs                                                           | S3  |
| 2 | Table S2 binding free energy based on the MM/PB(GB)SA method for rupintrivir and P2-m3 binding to EV-A71 and CV-A16 3Cpro | S10 |
| 3 | Figure S1 Rupintrivir in the active site of EV-A71 3Cpro                                                                  | S10 |
| 4 | Figure S2 Superimposition of ligand at the binding site derived from the last 50 ns of run1 simulation                    | S11 |
| 5 | Figure S3 The solubility of rupintrivir and P2-m3 from ADMET property                                                     | S12 |
| 6 | Figure S4 Sequence alignment of EV-A71 and CV-A16 3C proteases                                                            | S12 |

**1. Table S1** Chemical structures of rupintrivir and its 50 analogs

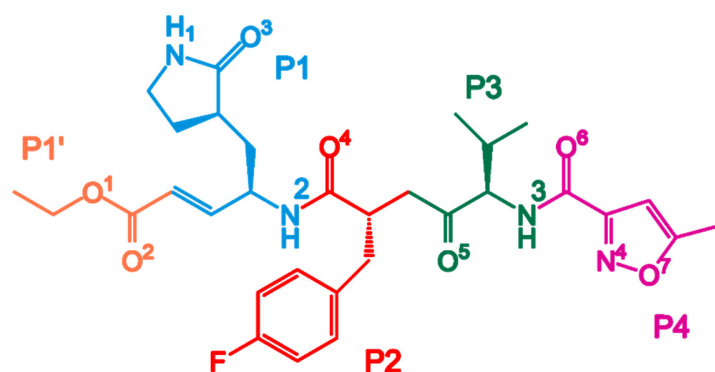

| Code        | P1' | P1 | P2 | P3 | P4 |
|-------------|-----|----|----|----|----|
| rupintrivir |     |    |    |    |    |
| P1'-1       |     |    |    |    |    |
| P1'-2       |     |    |    |    |    |
| P1-1        |     |    |    |    |    |
| P1-2        |     |    |    |    |    |
| P1-3        |     |    |    |    |    |
| P1-4        |     |    |    |    |    |

| Code  | P1' | P1                                                                                | P2                                                                                  | P3 | P4 |
|-------|-----|-----------------------------------------------------------------------------------|-------------------------------------------------------------------------------------|----|----|
| P1-5  |     | 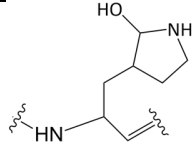 |                                                                                     |    |    |
| P2-p1 |     |                                                                                   |    |    |    |
| P2-p2 |     |                                                                                   |    |    |    |
| P2-p3 |     |                                                                                   |   |    |    |
| P2-p4 |     |                                                                                   |  |    |    |
| P2-p5 |     |                                                                                   |  |    |    |
| P2-p6 |     |                                                                                   |  |    |    |
| P2-p7 |     |                                                                                   |  |    |    |





| Code | P1' | P1 | P2 | P3                                                                                  | P4                                                                                    |
|------|-----|----|----|-------------------------------------------------------------------------------------|---------------------------------------------------------------------------------------|
| P3-3 |     |    |    | 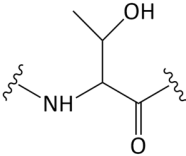 |                                                                                       |
| P3-4 |     |    |    |  |                                                                                       |
| P4-1 |     |    |    |                                                                                     |    |
| P4-2 |     |    |    |                                                                                     |   |
| P4-3 |     |    |    |                                                                                     |  |
| P4-4 |     |    |    |                                                                                     |  |
| P4-5 |     |    |    |                                                                                     |  |
| P4-6 |     |    |    |                                                                                     |  |

| Code  | P1' | P1 | P2 | P3 | P4                                                                                    |
|-------|-----|----|----|----|---------------------------------------------------------------------------------------|
| P4-7  |     |    |    |    | 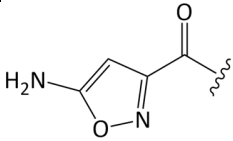   |
| P4-8  |     |    |    |    |    |
| P4-9  |     |    |    |    |    |
| P4-10 |     |    |    |    |    |
| P4-11 |     |    |    |    |   |
| P4-12 |     |    |    |    |  |
| P4-13 |     |    |    |    |  |
| P4-14 |     |    |    |    |  |
| P4-15 |     |    |    |    |  |
| P4-16 |     |    |    |    |  |



| Code  | P1' | P1 | P2 | P3 | P4                                                                                  |
|-------|-----|----|----|----|-------------------------------------------------------------------------------------|
| P4-17 |     |    |    |    | 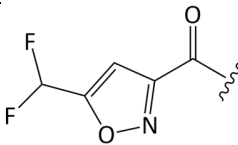 |
| P4-18 |     |    |    |    |  |
| P4-19 |     |    |    |    |  |

**2. Table S2** Binding free energy based on the MM/PB(GB)SA method of rupintrivir and P2-m3

| Compound    |         | EV-A71    |           | CV-A16    |           |
|-------------|---------|-----------|-----------|-----------|-----------|
|             |         | MM/PBSA   | MM/GBSA   | MM/PBSA   | MM/GBSA   |
| Rupintrivir | Run1    | -10.1±1.5 | -11.9±0.6 | -7.8±0.5  | -9.5±0.8  |
|             | Run2    | -7.1±1.2  | -9.1±1.0  | -6.0±0.4  | -8.5±0.9  |
|             | Run3    | -6.4±1.0  | -8.6±0.7  | -8.9±0.9  | -11.1±1.2 |
|             | Mean±SD | -7.9±2.0  | -9.9±1.4  | -7.6±1.1  | -9.7±1.7  |
| P2-m3       | Run1    | -17.2±0.6 | -17.4±0.5 | -11.8±0.3 | -13.0±0.4 |
|             | Run2    | -15.1±0.6 | -15.6±0.3 | -10.4±0.5 | -12.7±0.3 |
|             | Run3    | -15.0±0.8 | -15.4±0.6 | -10.1±0.7 | -12.9±1.0 |
|             | Mean±SD | -15.8±1.2 | -16.1±0.8 | -10.8±0.9 | -12.9±1.1 |

**3. Figure S1** Rupintrivir in the active site of EV-A71 3Cpro

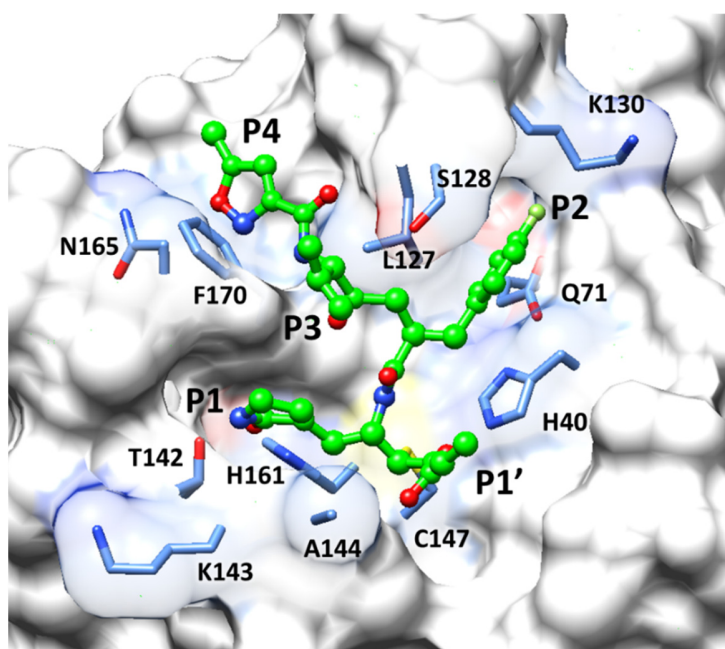

**Figure S1** Rupintrivir (bond and stick model) binding at the active site of EV-A71 3Cpro, where its the surrounding residues (stick model) are shown and labeled

**4. Figure S2** Superimposition of ligand at the binding site derived from the last 50 ns of run1 MD simulation

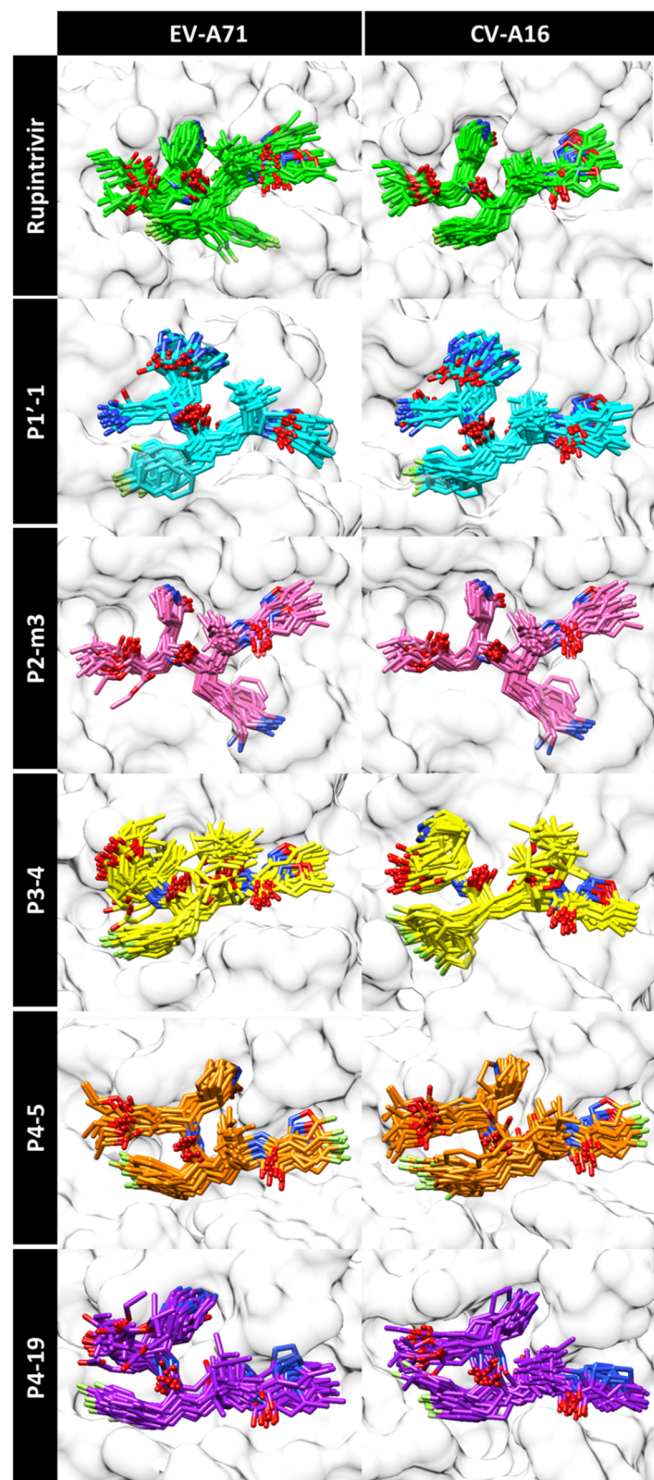

**Figure S2** Superimposition of rupintrivir and 5 screened analogs at the binding pocket of EV-A71 and CV-A16 3Cpro derived from the last 50 ns of run1 MD simulation

## 5. Figure S3. The solubility of rupintrivir and P2-m3 from ADMET property

| Compound                                                                                                     | Solubility                                                                                                                        |
|--------------------------------------------------------------------------------------------------------------|-----------------------------------------------------------------------------------------------------------------------------------|
| 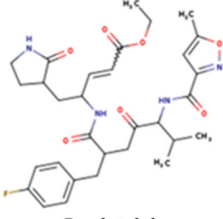 <p><b>Rupintrivir</b></p>  | <p>Log S (ESOL) <sup>?</sup> -6.05</p> <p>Solubility 5.36e-04 mg/ml ; 8.95e-07 mol/l</p> <p>Class <sup>?</sup> Poorly soluble</p> |
|  <p><b>P2-m3 analog</b></p> | <p>Log S (ESOL) <sup>?</sup> -3.72</p> <p>Solubility 1.17e-01 mg/ml ; 1.92e-04 mol/l</p> <p>Class <sup>?</sup> Soluble</p>        |

**Figure S3.** The solubility from ADMET property of rupintrivir and P2-m3. P2-m3 showed better solubility than rupintrivir

## 6. Figure S4. Sequence alignment of EV-A71 and CV-A16 3C proteases

|              |                     |                     |                     |                           |                     |
|--------------|---------------------|---------------------|---------------------|---------------------------|---------------------|
| Consensus    | 1                   | 11                  | 21                  | 31                        | 41                  |
| Conservation | - - - M G P S L D F | A L S L L R R N i R | Q V Q T D Q G H F T | M L G V R D R L A i       | L P R H S Q P G K T |
| 3R0F.pdb     | G S H M G P L D F   | A L S L L R R N V R | Q V Q T D Q G H F T | M L G V R D R L A V       | L P R H S Q P G K T |
| 3SJI.pdb     | - - - M G P S L D F | A L S L L R R N I R | Q V Q T D Q G H F T | M L G V R D R L A I       | L P R H S Q P G K T |
| Consensus    | 51                  | 61                  | 71                  | 81                        | 91                  |
| Conservation | I W i E H K L i N V | L D A V E L V D E Q | G V N L E L T L i T | L D T N E K F R D i       | T K F I P E t I s t |
| 3R0F.pdb     | I W I E H K L V N V | L D A V E L V D E Q | G V N L E L T L I T | L D T N E K F R D I       | T K F I P E N I S T |
| 3SJI.pdb     | I W V E H K L I N V | L D A V E L V D E Q | G V N L E L T L V T | L D T N E K F R D V       | T K F I P E T I T G |
| Consensus    | 101                 | 111                 | 121                 | 131                       | 141                 |
| Conservation | A S D A T L i I N T | E H M P S M F V P V | G D V V Q Y G F L N | L S G K P T h R T M       | M Y N F P T K A G Q |
| 3R0F.pdb     | A S D A T L V I N T | E H M P S M F V P V | G D V V Q Y G F L N | L S G K P T G R T M       | M Y N F P T K A G Q |
| 3SJI.pdb     | A S D A T L I I N T | E H M P S M F V P V | G D V V Q Y G F L N | L S G K P T H R T M       | M Y N F P T K A G Q |
| Consensus    | 151                 | 161                 | 171                 | 181                       | 191                 |
| Conservation | C G G V V T S V G K | I I G I H I G G N G | R Q G F C A G L K R | s Y F A S E Q - - -       | - - -               |
| 3R0F.pdb     | C G G V V T S V G K | I I G I H I G G N G | R Q G F C A G L K R | S Y F A S E Q - - -       | - - -               |
| 3SJI.pdb     | C G G V V T S V G K | I I G I H I G G N G | R Q G F C A G L K R | G Y F A S E Q H H H H H H | - - -               |

**Figure S4.** Sequence alignment of EV-A71 (PDB code: 3SJI) and CV-A16 (PDB code: 3R0F) proteases
